# Supplementary material
Source: Springer Nature journal article supplement (https://www.springermedizin.de/resource/supplementary/12936_2011_1907_MOESM5_ESM.pdf/9542024)

**A**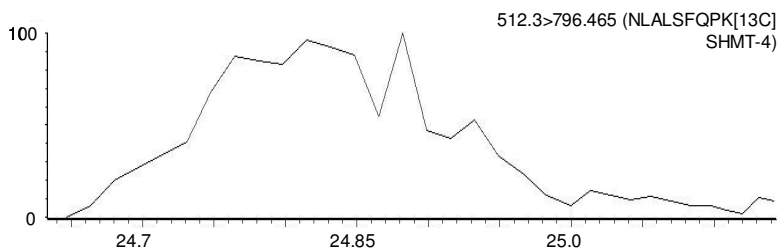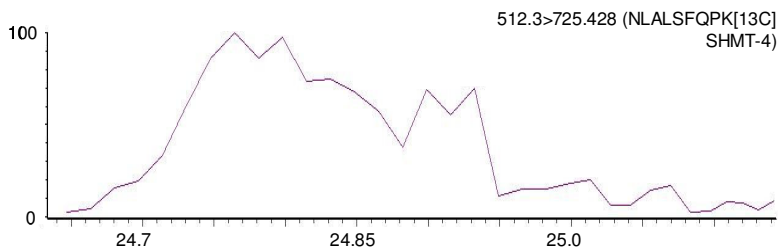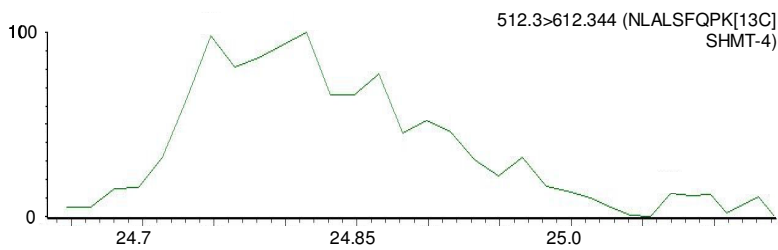**B**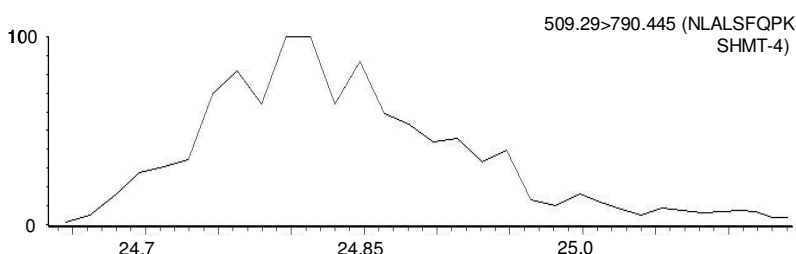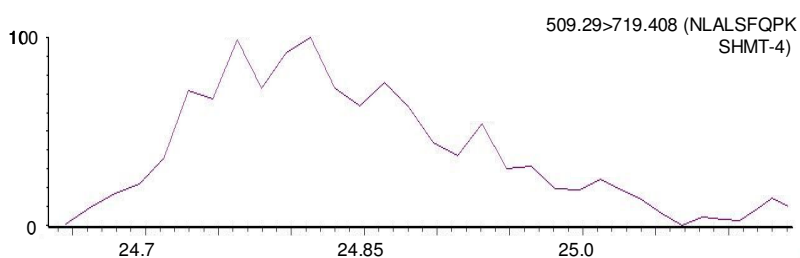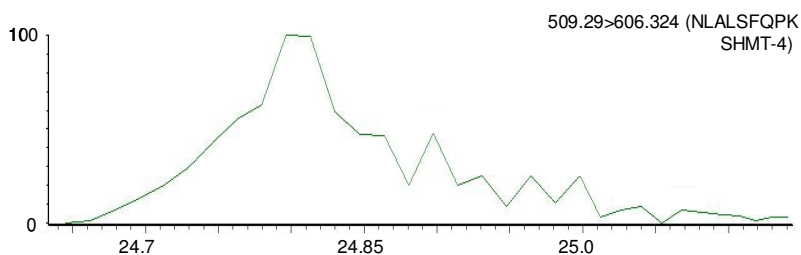

Supplement: MOESM5 [file 9542024]
